# Supplementary material for: A new basal ornithopod (Dinosauria: Ornithischia) from the Early Cretaceous of Texas
Source: PLoS One. 2019 Mar 12;14(3):e0207935. doi: 10.1371/journal.pone.0207935 (PMC6413910; doi:10.1371/journal.pone.0207935)
Supplement: S1 Table — (XLSX) [file pone.0207935.s001.xlsx]

## Sheet: Complete Femora
				Complete Femora
	SMU	Quarry Loc.	Element	Modifier	Length	prox. condylar width	dist. condylar width	min. circum.
	70445	BMQ	Femur	Rt.	51	10.1	10.4	23.9
	70456	2BQ	Femur	Lt.	273	60	70
	70456	2BQ	Femur	Rt.	273.7	62	73
	71624	3BS	Femur	Rt.	100	22.7	25.7
	71638	3BS	Femur	Lt.	93.4	19.7	19.5	37
	71836	3BS2	Femur	Lt.	98.9	22	21.7	37.4
	71840	3BS2	Femur	Rt.	107.5	23.4		38.5
	71842	3BS2	Femur	Lt.	100	23.8	23.14	45.4
	71843	3BS2	Femur	Lt.	99	21	24	45
	73568	3BS2	Femur	Lt.	84.1	21	20.4	35.3
	74085	2DU	Femur	Lt.	139			60.4
	74093	2DU	Femur	Rt.	130.1	34.3	34.12	51
	74094	2DU	Femur	Lt.	133.6	36.4	34	53
	74536	3BS1	Femur	Rt.	99	21.85	25	41
	74665	3BS1	Femur	Rt.	107.6	22.8	17.1	39
	74665	3BS1	Femur	Lt.	105.7	22.5	19.8	39
	74670	5-10-93-A	Femur	Rt.	315	72.4		114.5
	75612	3BS2	Femur	Lt.	107.5	25	26.1	42
	75635	3BS2	Femur	Rt.	125	27	31	52

## Sheet: Incomplete Femora
Incomplete Femora with Predicted Lengths
SMU	Quarry Loc.	Element	Modifier	proximal condylar width (mm)	distal condylar width (mm)	Predicted Length Estimate (mm)
70447	BMQ	Femur	Lt. prox.	10.4		47.2
70448	BMQ	Femur	Rt. prox.	12		54.1
71465	1A38	Femur	Lt. distal		24.1	104.4
71493	2AY	Femur	Lt. distal		82.5	307.4
71623	3BS	Femur	Lt. prox.	22.6		99.8
71623	3BS	Femur	Rt. distal		22.9	100.3
71628	3BS	Femur	Lt. distal		23	100.6
71652	3AP	Femur	Rt. prox.	23		101.5
71839	3BS2	Femur	Rt. distal		21	93.7
71841	3BS2	Femur	Rt. distal		26.5	112.8
72316	3AS	Femur	Lt. distal		76.5	286.6
72450	BMQ	Femur	Lt. distal		14.1	70
72451	BMQ	Femur	Lt. distal		15.7	75.2
72452	BMQ	Femur	Rt. distal		14.6	71.4
72543	BMQ	Femur	Lt. prox.		12.6	64.5
72567	BMQ	Femur	Rt. distal		17.1	80.1
72568	BMQ	Femur	Lt. distal		16.6	78.4
72569	BMQ	Femur	Lt. prox.	16.7		74.4
72834	8-25-86A	Femur	Rt. distal		85	316.1
73569	1B7	Femur	Rt. distal		62	236.2
73569	1B7	Femur	Lt. distal		63	239.6
74097	2DU	Femur	Lt. distal		35.8	145.1
75564	1B7	Femur	Rt. distal		62	236.2
75565	1B7	Femur	Rt. distal		68.5	258.8
77617	2CN	Femur	Lt. prox.	52.5		228.6
77617	2CN	Femur	Rt. distal		44.6	175.7

## Sheet: Minimum Number of Individuals
Minimum number of individuals estimated based on locality and length. Complete femora are listed in black while estimated femora lengths are listed in red.
SMU	Quarry Loc.	Element	Modifier	Length (mm)
70447	BMQ	Femur	Lt. prox.	47.2103
70456	2BQ	Femur	Lt.	273
71465	1A38	Femur	Lt. distal	104.44
71493	2AY	Femur	Lt. distal	307.404
71623	3BS	Femur	Lt. prox.	99.7774
71638	3BS	Femur	Lt.	93.4
71652	3AP	Femur	Rt. prox.	101.5
71836	3BS2	Femur	Lt.	98.9
71842	3BS2	Femur	Lt.	100
71843	3BS2	Femur	Lt.	99
72316	3AS	Femur	Lt. distal	286.6
72450	BMQ	Femur	Lt. distal	70
72451	BMQ	Femur	Lt. distal	75.2468
72543	BMQ	Femur	Lt. prox.	64.5
72568	BMQ	Femur	Lt. distal	78.3746
72834	8-25-86A	Femur	Rt. distal	316.092
73568	3BS2	Femur	Lt.	84.1
73569	1B7	Femur	Rt. distal	236.158
74085	2DU	Femur	Lt.	139
74094	2DU	Femur	Lt.	133.6
74097	2DU	Femur	Lt. distal	145.102
74536	3BS1	Femur	Rt.	99
74665	3BS1	Femur	Rt.	107.6
74670	5-10-93-A	Femur	Rt.	315
75564	1B7	Femur	Rt. distal	236.2
75565	1B7	Femur	Rt. distal	258.8
75612	3BS2	Femur	Lt.	107.5
75635	3BS2	Femur	Rt.	125
77617	2CN	Femur	Lt. prox.	228.6

## Sheet: Clusters Locality Dist.
Data used to create femur length distribution of Proctor Lake fossil localities showing clusters of individuals. Note that 3BS was seperated into 3 distinct blocks during excavation, but here is listed as one locality
SMU	Quarry Loc.	Element	Modifier	Length (mm)
70447	BMQ	Femur	Lt. prox.	47.2103
72543	BMQ	Femur	Lt. prox.	64.5
72450	BMQ	Femur	Lt. distal	70
72451	BMQ	Femur	Lt. distal	75.2468
72568	BMQ	Femur	Lt. distal	78.3746
73568	3BS	Femur	Lt.	84.1
71638	3BS	Femur	Lt.	93.4
71836	3BS	Femur	Lt.	98.9
74536	3BS	Femur	Rt.	99
71843	3BS	Femur	Lt.	99
74665	3BS	Femur	Rt.	107.6
71842	3BS	Femur	Lt.	100
71628	3BS	Femur	Lt. distal	100.617
75612	3BS	Femur	Rt.	125
75635	3BS	Femur	Lt.	107.5
74094	2DU	Femur	Lt.	133.6
74085	2DU	Femur	Lt.	139
74097	2DU	Femur	Lt. distal	145.102
75564	1B7	Femur	Rt. distal	236.158
73569	1B7	Femur	Rt. distal	236.158
75565	1B7	Femur	Rt. distal	258.8
