# Supplementary material for: A new basal ornithopod (Dinosauria: Ornithischia) from the Early Cretaceous of Texas
Source: PLoS One. 2019 Mar 12;14(3):e0207935. doi: 10.1371/journal.pone.0207935 (PMC6413910; doi:10.1371/journal.pone.0207935)
Supplement: S2 Table — (XLSX) [file pone.0207935.s002.xlsx]

## Sheet: Sheet1
	Specimen	Site	Premaxillary tooth row length (mm)	Number of premaxillary teeth	Maxillary tooth row length (mm)	Number of maxillary teeth	Dentary tooth row length (mm)	Number of dentary teeth	Scapula length (mm)	Humerus length (mm)	Femur length (mm)	Tibia length (mm)
	70444	3BS	11	4	-	-	39 (rt)	8	-	-	-	-
	75380	3BS	11	4	-	-	-	-	-	-	-	-
	74664	3BS	-	-	-	-	-	-	75 (lt)	75 (lt)
	71836	3BS	-	-	-	-	-	-	-	-	99 (lt)	100 (lt)
	74749	3BJ	-	-	38 (rt)	8	-	-	94 (rt)	93 (rt)	-	-
	74087	2DU	17	4	48 (lt)	9	52 (rt)	11	-	-	-	-
	74093	2DU	-	-	-	-	-	-	-	-	130 (rt)	155 (rt)
	75564	3BS East	-	-	-	-	-	-	192 (rt)	175 (rt)	*236 (rt)	-
	70635	1B7	-	-	59 (rt)	10	-	-	-	-	-	-
	72316	3AS	25	4	60 (rt)	10	-	-	-	-	*282 (lt)	*314 (lt)
	72834	8-25-86A	-	-	87 (lt)	10	95 (rt)	*11	239 (rt)	221 (rt)	*316 (rt)	*362 (lt)
