# Supplementary material for: A new basal ornithopod (Dinosauria: Ornithischia) from the Early Cretaceous of Texas
Source: PLoS One. 2019 Mar 12;14(3):e0207935. doi: 10.1371/journal.pone.0207935 (PMC6413910; doi:10.1371/journal.pone.0207935)
Supplement: S3 Table — (XLSX) [file pone.0207935.s003.xlsx]

#NEXUS
[written Thu Jun 07 11:04:24 CDT 2018 by Mesquite  version 3.2 (build 801) at DESKTOP-CI8QB9B/10.8.124.73]

BEGIN TAXA;
	TITLE Taxa;
	DIMENSIONS NTAX=50;
	TAXLABELS
		Euparkeria_capensis Marasuchus_liloensis_ Herrerasaurus_ Pisanosaurus_mertii Abrictosaurus_consors BMNH_A100 Fruitadens_haagarorum Tianyulong Heterodontosaurus_tucki Lycorhinus_angustidens Eocursor_parvus Lesothosaurus_diagnosticus Scutellosaurus_lawleri Laquintasaura Emausaurus_ernstii Scelidosaurus_harrisonii Stegosauria Ankylosauria Agilisaurus_louderbacki Hexinlusaurus_multidens Othnieliosaurus_consors Wannanosaurus_yansiensis_ Goyocephale_lattimorei Homalocephale_calathocercos_ Pachycephalosauridae Micropachycephalosaurus_hongtuy Stenopelix_valdensis Chaoyangosaurus_youngi Yinlong_downsi Albalophosaurus_yamaguchiorum Psittacosauridae Liaoceratops_yanzigouensis_ Archaeoceratops_oshimai Unnamed_taxon__Coronosauria___L Orodromeus_makelai Zephyrosaurus_schaffi Haya_griva Changchunsaurus_parvus Jeholosaurus_shangyuanensis Hypsilophodon_foxii Proctor_Taxon Thescelosaurus_neglectus Parksosaurus_warreni Gasparinisaura_cincosaltensis Talenkauen_santacrucensis Rhabdodontidae Tenontosaurus_tilleti Tenontosaurus_dossi Dryosauridae Ankylopollexia 
	;

END;


BEGIN CHARACTERS;
	TITLE  Character_Matrix;
	DIMENSIONS  NCHAR=234;
	FORMAT DATATYPE = STANDARD GAP = - MISSING = ? SYMBOLS = "  0 1 2 3 4 5";
	MATRIX
	Euparkeria_capensis              0000??000000000?00000000000000????000?0000000000000000000000000100000??000000100000000?0000??????0000000000000002000000?00?10010000001000100000000?100011000?00???0?10000000??201000000000000?000???0000?00000000000000000?1?000?000??????
	Marasuchus_liloensis_            0?0?????????????????????????????????????????????????????????????????????????????00?0????????????????????????????????????????????????010?0?00000?0????????000????????10000010??200000000000000?000???0001010000000101001000?0?000?000??????
	Herrerasaurus_                   0000??000000000?11010010000000????000?0000000010000000000000000100000??000000100?000?0?0000??????0000000000000002000000?00?10010000000020100000000????1110001101001100000000?0100000010000000?000???0001010000000000000000?00001?0001?????
	Pisanosaurus_mertii              0?0???????????????????????1???????????????????????????????????????????????????????????????????????000?10?000000????1??0?00??00?11110??0???????????????????????????????????????????????????????0???????????????0?0?0????0???0001??000??????
	Abrictosaurus_consors            0000??10011??011000?100??0100100000?0??????????????????0?????????????????????????????????011000?1000011000?00?0030011?0?0??001?11110????????0????????0?10000?10??01?01000000?11?100??????????????????0?2?200??1???010110???0001?11????????
	BMNH_A100                        0??0??1?0??1?01100??100?00100???????0?0??00?00???????????????????000??????0??????????????0???????0000?????????0030111?0?0??011111110??????????????????????????????????????????????????????????????????????????????????????????1???????????
	Fruitadens_haagarorum            0??0??1?0??1??11?????0??001??????????????????????????????????????????????????????????????????????0000??0???????03101100?00?011011110??0???3??????????????0001????????????????????????????????????????002120000111?????????????011110??????
	Tianyulong                       0000??1101??0011000?1000??10??????00????00????????????0????????2??????????????????????????11?00???010110000?000050?1??0?0??010?10120???????????????????1??00????????????????????????00010?1110??????10?????1001???01???01100000??????????0
	Heterodontosaurus_tucki          0000??1101111011000110010010010000000?00100100?0000001000000000200000??000000000000000?00011000?10000110000001003011111011{0 1}111111011?001?03?00000010?01100001101001101000000?111100000100?110?00100010021200001??001011010000011111000?0??
	Lycorhinus_angustidens           0????????????011????100??010???????????????????????????????????????????????????????????????????????????????????????11?0?0??0??111110??????????????????????????????????????????????????????????????????????????????????????????1???????????
	Eocursor_parvus                  0?0??????????????????????????????????????????????????????????????0000?????????????00?????????????10000100010000????11?0??0?00?01?110??0?0?2??????????0010000??01?01?01?00000?1110000000100110?00100010020200001???0?????1??0000000?1???0??
	Lesothosaurus_diagnosticus       0000??100011000?000?10000010110000000?0000000010000001000000000000000??0000000000000?0?00010000001000010001000000101100?00?000011110000?0120000??????00100000000?00001000000?0100000000111110?0010001002020000111001?1101000001000010?00??
	Scutellosaurus_lawleri           0?00????0?11????00????????10???????10?00000000100??????0??0????1100??????????????????????1????????0000????1?0?000?01100?00?0?00111100?01012??0?1???????1?000?00??00001000000??1?0??0000000110?0010??10020200001???0????01??11000000100?0??
	Laquintasaura                    0?????1?????????????1000??0????????1??000000?????00??????000???110?00?????000?????0????????????????????????????000?3100000?0??01?1??????0???????0?????000???????????01???00????0000000011111???01?00??02020001101??????0??????0?0?01?????0
	Emausaurus_ernstii               00?0???000?1000?000?10000010010100010?0000000010000001000?00000?00000??0000????00?00?????1?0?????1100010001000001101100?00?000011110?????????????????????????01????????????????????????????????????????????????????????0???11?0???????????
	Scelidosaurus_harrisonii         0000??100???0?0????010100010011?2?010?0000100010000001000000000100000??000000?001001?10001?0?????1100010101000101101100?00?0000111100000022000000010?0010000????????01001000?0000000000001110?01100010020210001110000111100111100001??????
	Stegosauria                      0000??1000110{0 1}0?000010000010011?2?010?0000000000000011000110000100000??0000{0 1}0100100001?000100000011001100000000{0 1}?101100?00?000011110110{0 1 2}0{0 1 2}2000100010?0011000?010100001111000?0000000002001110?0{0 1}1010110??01000111?121111{0 1}0011000?001?????0
	Ankylosauria                     0000??100011000?000011?00010011?2??10?00001100000000?1?10010000101?10??100000?00100001100110000?1110001010000010?101100?00?00001111011000?{1 2}000000010100?1000?010100011111000?000000100{0 2}001111{0 1}111000110??01000111?121111100111{0 1}0?0?1?????0
	Agilisaurus_louderbacki          0000??100011000?00011000?010?10111000?00000000000000?1000100000100000??000010?00000??0?00010?00001000110100000001101100?00?0200111100111012000000010?1010100????????01000000?0100010000110110?00101010020200001110010110100000100001?????0
	Hexinlusaurus_multidens          0?00???0??????????011000??10?10000100?00000000000000?1000?00000?00000??00001?????????????0???????1000110????000????1101000?0?00111100101012000000010?10100000000000001000000?1101010000011110?00111110020200001111010110100000000001?????0
	Othnieliosaurus_consors          0??????????????????????????????????????????????????????????????????????????????????????????????????00???????0?0????1110?00?0???1?1?0??0?013?000?011010010000????????01000000?1111110000011110?001111101312000011110101101?0000?00001??0000
	Wannanosaurus_yansiensis_        0????????????????????????????11????00?000101000000???????????????0001001101??????????????0???????00001001000000????11?0??0?0???11110??0??????????????????111?????????1?111??????1????????????????????0????00??1???????????????0001?0?????0
	Goyocephale_lattimorei           0??0???001???01100001?????10?11?1??00?0001?10??????1????????????0000100111110?????1?1??0?0???????00001?010?0100031111?{0 1}{0 1}00?01??111?00???1?2?????????2????111????????0101110101211?????????????????????????????1??1?????011100010?????????0
	Homalocephale_calathocercos_     0??0????????????????11????10?11?1??00?000111000000?11100000000000001100111110?000110?0??10???????????????????0?????11?110??0???11110????1?3111??0???2???????????????010111011121111110000111111013111013110?0?11?10?????1110001?010??????0
	Pachycephalosauridae             0000??100111001{0 1}000011???010011?1??00?000111000000?111000000000001?1100111110?{0 1}0011010?{0 1}10???????0000100100010003{0 1}{0 1}11?{0 1}{0 1}00?0{1 2}?0{0 1}1110????1?3?11??0???20110111????????0101110111211111100001???????????013110?0???????????1110001001?1?????0
	Micropachycephalosaurus_hongtuy  0?????????????????????????????????????????????????????????00???2???????????????????????????????????????????????????11?0????0???111?0????????????0???????????????????01?000??????1?1??????????????????0131?0?0?????????????????0??????????0
	Stenopelix_valdensis             0?????????????????????????????????????????????????????????????????????????????????????????????????????????????????????????????????????????3?00??0???????1???????????01001100?1111010200001111?00121?10131?????1???000110100000???001?????0
	Chaoyangosaurus_youngi           01?1001?00?0?000110?1????011???????2100001????000????1000?000002???????????????0??0??0?0?011101?01000110100110004101110?00?000011110??0????????????????1??????????????????????????????????????????????????????????????????????1??????????0
	Yinlong_downsi                   0111011?0010??0?00011010??10?1000002101001000000000011000?00000200101010110100?00112????00101001010001100101100031011?0?0??000?11110???????????????????????????????001001100?1?110????????111000121010?2120????????????0???000??????00???0
	Albalophosaurus_yamaguchiorum    0????????????????????00???0??1010?????0?00????????????????0?????0?????????000?????02?????0???????????110????0?0????111111110???111?0??????????????????????????????????????????????????????????????????????????????????????????1??????????0
	Psittacosauridae                 01110011001000??11001???0011010100?21010000000100000110000000002000010100000{0 1}000000010?10011{0 1}00001001111{0 1}{0 1}000001???11111110000011110010{0 1}003100?0001110{0 1}100000000000001000000??211{0 1}10000001111100121010{0 1}31201001110000110100000100001?????0
	Liaoceratops_yanzigouensis_      00?111110010001000011000?0110?????0211100010110000101100000100020010111000001?010001?0?000110010010011111001100031011111111000011110??????????????????????????????????????????????????????????????????????????????????????????1?????00???0
	Archaeoceratops_oshimai          001111100010001000001000?010010100021111011011000010?1011?0100020010111000001?01??01?0???0111011010001111011100031011???1?1000011111????103110??0???????????????????01000000?1211110?0000111110012101?131?????11110001101000001???0?10???0
	Unnamed_taxon__Coronosauria___L  0011111000?000101000101000100101000211110010110000101101100100020010111000001?01000{1 2}10?100111011010?01111011000{0 1}41011111111000011111?102?03?00?00011101100000000010001000010?121111000000111110010001013120100111100011{0 1}100000100001?????0
	Orodromeus_makelai               0000??100011?10?000110101010010000000?0010000000010011000000000010000??0000100000000?????01???0?01000110110000001101100?00?00001111001010131000?0?1010010?000000000001000000?1211110000011110?001111101312010{0 1}11110001101?000010001?100000
	Zephyrosaurus_schaffi            0??0??1?01110?10000?10??1010?10100?00?00100000?0?100??0??100???010000??00?0100000001?????0?????????????????????0110111?100?00?011110??????????????????????????????????????????????????????????????????????????????????????????1?????0000?0
	Haya_griva                       00?0??10001?011011011001001001001010000000001010010011000000111010000??0000100000000?001001110?101000110110000001101101100?00001111001010131000?0?1010010000?00???0?01000000?121100000001?110?001111101312000011?1000??0100000000001?????0
	Changchunsaurus_parvus           0000??1?0011?110000?10???010?10?0??00?00110???100???11000000???0????0??000????000?0000?00011101101010111110000001101101{0 1}00?0000111100101?1??????????1?010?0?????????0????????1?1?1????????????????????131?????1?1?01???01?000010000??????0
	Jeholosaurus_shangyuanensis      00?0??110011010?00011000??10?10000100?0001000010000011000000111010000??0000100?00?001???00111000010001101000000001011?1100?0000111100001??30000?0?1??1001000????????01000000?1110110000110110??01???10131200001111010??01?0000??000100??00
	Hypsilophodon_foxii              0000??1001110110000110010010010000100?0000000000000011000000111010000??000010000000100?00011100001000110110001001101111{0 1}0100000111100101013100000110100100000000000001000000?1211110000011110?00111110131200001111000110110000100001000100
	Proctor_Taxon                    00?0??1001110110000010000010010011100000000000000000110000001110100000??00010110000000???01100000101011111200100210111110100000111100111013100100?10?001000000000000010000{0 1}0?1111110001011110-00101110131201001111000110110000100001001111
	Thescelosaurus_neglectus         0000??1001110110000?10101010010010100?0000000000010011000?00?11000000??0000?00100001?????011100101000110112000000101101101000001111001010231001?0110000100000000000001000010?1111011000011110?001111101312110011110001101100001000011010?0
	Parksosaurus_warreni             000????0??????10???01010??10010?0?100?0000001?00?000?1100?000?00?0000????00???????0??????0????????000110???0010????111?100?000011110????023?00?0111?10000000????????01000000????1??000001111??001111101312100?1???0001101100001?0001???1?0
	Gasparinisaura_cincosaltensis    000???????????10????1010??10010000100?0000000000000?01100?000?0??00?0??000000000?????????0????????0001101100010????111111??000?111100?0???3100??1?10???00?00????????01000010?1111110000011110?00111110131200001111020110110000?00001?1??10
	Talenkauen_santacrucensis        0?00??101??1?010000?10???0100????????????????????????????????????????????????????????????01110?10100011?????0?001???1??10???0??11110?00102????????10?0010010????????01000010?1111?1???????11??0010111?1312????111?000?101?0000??00???????0
	Rhabdodontidae                   0000??10010100??0000101000100?????100?00000000011000111000000?0200000??0000101000?01?????011000101010111??000001???21111010100011110?11?0?3?001?0?10??000?00????????01001000??111011010001???????????11312111?111???????11?0001000010??110
	Tenontosaurus_tilleti            0000??11110100??001010100110010000100?0000000000100011100000111000000??0000101100001?0?0001101000101011111200001???211100101000111100012023100110010100000000000110001000010?1111110001011111000101111131211111111000110110000100001??1110
	Tenontosaurus_dossi              0000??111101001000101010011001000010000000000000100011000000111000000??0000101100?0?00?0?0110100010101111?200000???21110010100011110?0120?3?00110?1010010000000???0001000010?1111110001011110-0010111013121111111?000110110000100001?11110
	Dryosauridae                     0000??11110110??001010100110110001000?000000000100001110000011?000000??000010110000100?0001101010100011110000001???21110110100011110?11101310010001010000000????????01000010?1111111011011110?001011101312011111110201101000001000011?1110
	Ankylopollexia                   0000??11110100??001010100110010000000?0000000001000011100000{0 1}10000000??000010110000200?0001101010101011111000101???21110110100011111011{1 2}02{2 3}?00100010{1 2}00{0 1}000000001100010000{0 1}0?11111110110111110001011111{2 3}1211111110000110102000100001?????0

;

END;
BEGIN ASSUMPTIONS;
	TYPESET * UNTITLED   =  unord:  1 -  234;

END;

BEGIN MESQUITECHARMODELS;
	ProbModelSet * UNTITLED   =  'Mk1 (est.)':  1 -  234;
END;

Begin MESQUITE;
		MESQUITESCRIPTVERSION 2;
		TITLE AUTO;
		tell ProjectCoordinator;
		timeSaved 1528387464274;
		getEmployee #mesquite.minimal.ManageTaxa.ManageTaxa;
		tell It;
			setID 0 4560512878070259385;
		endTell;
		getEmployee #mesquite.charMatrices.ManageCharacters.ManageCharacters;
		tell It;
			setID 0 1202724517948389993;
			mqVersion 320;
			checksumv 0 3 1159935235 null  getNumChars 234 numChars 234 getNumTaxa 50 numTaxa 50   short true   bits 2305843009213694015   states 63   sumSquaresStatesOnly 21952.0 sumSquares -2.1213755684765984E20 longCompressibleToShort false usingShortMatrix true   NumFiles 1 NumMatrices 1;
			mqVersion;
		endTell;
		getWindow;
		tell It;
			suppress;
			setResourcesState false false 100;
			setPopoutState 300;
			setExplanationSize 0;
			setAnnotationSize 0;
			setFontIncAnnot 0;
			setFontIncExp 0;
			setSize 3200 1559;
			setLocation -16 0;
			setFont SanSerif;
			setFontSize 10;
			getToolPalette;
			tell It;
			endTell;
			desuppress;
		endTell;
		getEmployee  #mesquite.minimal.ManageTaxa.ManageTaxa;
		tell It;
			showTaxa #4560512878070259385 #mesquite.lists.TaxonList.TaxonList;
			tell It;
				setTaxa #4560512878070259385;
				getWindow;
				tell It;
					newAssistant  #mesquite.lists.TaxonListCurrPartition.TaxonListCurrPartition;
					setExplanationSize 30;
					setAnnotationSize 20;
					setFontIncAnnot 0;
					setFontIncExp 0;
					setSize 3100 1487;
					setLocation -16 0;
					setFont SanSerif;
					setFontSize 10;
					getToolPalette;
					tell It;
					endTell;
				endTell;
				showWindow;
				getEmployee #mesquite.lists.ColorTaxon.ColorTaxon;
				tell It;
					setColor Red;
					removeColor off;
				endTell;
				getEmployee #mesquite.lists.TaxonListAnnotPanel.TaxonListAnnotPanel;
				tell It;
					togglePanel off;
				endTell;
			endTell;
		endTell;
		getEmployee  #mesquite.charMatrices.BasicDataWindowCoord.BasicDataWindowCoord;
		tell It;
			showDataWindow #1202724517948389993 #mesquite.charMatrices.BasicDataWindowMaker.BasicDataWindowMaker;
			tell It;
				getWindow;
				tell It;
					getTable;
					tell It;
						rowNamesWidth 561;
					endTell;
					setExplanationSize 30;
					setAnnotationSize 20;
					setFontIncAnnot 0;
					setFontIncExp 0;
					setSize 3100 1487;
					setLocation -16 0;
					setFont SanSerif;
					setFontSize 36;
					getToolPalette;
					tell It;
						setTool mesquite.charMatrices.BasicDataWindowMaker.BasicDataWindow.ibeam;
					endTell;
					setActive;
					setTool mesquite.charMatrices.BasicDataWindowMaker.BasicDataWindow.ibeam;
					colorCells  #mesquite.charMatrices.NoColor.NoColor;
					colorRowNames  #mesquite.charMatrices.TaxonGroupColor.TaxonGroupColor;
					colorColumnNames  #mesquite.charMatrices.CharGroupColor.CharGroupColor;
					colorText  #mesquite.charMatrices.NoColor.NoColor;
					setBackground White;
					toggleShowNames on;
					toggleShowTaxonNames on;
					toggleTight off;
					toggleThinRows off;
					toggleShowChanges on;
					toggleSeparateLines off;
					toggleShowStates on;
					toggleAutoWCharNames on;
					toggleAutoTaxonNames off;
					toggleShowDefaultCharNames off;
					toggleConstrainCW on;
					toggleBirdsEye off;
					toggleShowPaleGrid off;
					toggleShowPaleCellColors off;
					toggleShowPaleExcluded off;
					togglePaleInapplicable on;
					toggleShowBoldCellText off;
					toggleAllowAutosize on;
					toggleColorsPanel off;
					toggleDiagonal on;
					setDiagonalHeight 80;
					toggleLinkedScrolling on;
					toggleScrollLinkedTables off;
				endTell;
				showWindow;
				getWindow;
				tell It;
					forceAutosize;
				endTell;
				getEmployee #mesquite.charMatrices.AlterData.AlterData;
				tell It;
					toggleBySubmenus off;
				endTell;
				getEmployee #mesquite.charMatrices.ColorByState.ColorByState;
				tell It;
					setStateLimit 9;
					toggleUniformMaximum on;
				endTell;
				getEmployee #mesquite.charMatrices.ColorCells.ColorCells;
				tell It;
					setColor Red;
					removeColor off;
				endTell;
				getEmployee #mesquite.categ.StateNamesStrip.StateNamesStrip;
				tell It;
					showStrip off;
				endTell;
				getEmployee #mesquite.charMatrices.AnnotPanel.AnnotPanel;
				tell It;
					togglePanel off;
				endTell;
				getEmployee #mesquite.charMatrices.CharReferenceStrip.CharReferenceStrip;
				tell It;
					showStrip off;
				endTell;
				getEmployee #mesquite.charMatrices.QuickKeySelector.QuickKeySelector;
				tell It;
					autotabOff;
				endTell;
				getEmployee #mesquite.charMatrices.SelSummaryStrip.SelSummaryStrip;
				tell It;
					showStrip off;
				endTell;
				getEmployee #mesquite.categ.SmallStateNamesEditor.SmallStateNamesEditor;
				tell It;
					panelOpen true;
				endTell;
			endTell;
		endTell;
		endTell;
end;
